# Supplementary material for: A rhodamine-formaldehyde probe fluorescently discriminates H2S from biothiols
Source: Royal Society of Chemistry journal article supplement (doi:10.1039/c4ay00090k), 2014-01-01
Supplement: c4ay00090k1.pdf [file c4ay00090k1.pdf]

## Supporting Information

### A Rhodamine-Formaldehyde Probe Fluorescently Discriminates H<sub>2</sub>S from Biothiols

Xufeng Hou,<sup>a,b</sup> Xinling Guo,<sup>a</sup> Zhaoyang Luo,<sup>a</sup> Huijun Zhao,<sup>a</sup> Bing Chen,<sup>a</sup> Jin Zhao,<sup>a,\*</sup> Jianghong Wang<sup>a,\*</sup>

<sup>a</sup> *Key Laboratory of Natural Medicine and Immuno-Engineering of Henan Province, Henan University, Kaifeng, Henan, 475004, People's Republic of China;*

<sup>b</sup> *School of Chemistry and Chemical Engineering, Xuchang University, Xuchang, 461000, P. R. China.*

| <b>Contents:</b>                                                                                  | <b>page</b> |
|---------------------------------------------------------------------------------------------------|-------------|
| <b>1. General Experimental Section</b>                                                            | <b>1</b>    |
| <b>2. Synthesis Section</b>                                                                       | <b>3</b>    |
| <b>3. Absorption and Emission Spectra of Rhod-CHO with NaHS</b>                                   | <b>6</b>    |
| <b>4. Time dependence of fluorescence profile of Rhod-CHO upon addition of NaHS in PBS buffer</b> | <b>7</b>    |
| <b>5. Fluorescence response of Rhod-CHO upon addition of various species in PBS buffer</b>        | <b>8</b>    |
| <b>6. <sup>1</sup>H NMR, <sup>13</sup>C NMR and HRMS of Rhod-CHO</b>                              | <b>9</b>    |
| <b>7. <sup>1</sup>H NMR, <sup>13</sup>C NMR and HRMS of RS</b>                                    | <b>10</b>   |

## 1. General Experimental Section

**Materials:** All the reagents were purchased from commercial suppliers (Sinopharm Chemical Reagent Co. Ltd., China; Alfa Aesar Chemical Co. Ltd.) and were of AR grade, and MeCN were of HPLC grade. Solvents were dried according to standard procedures. All reactions were magnetically stirred and monitored by thin-layer chromatography (TLC). Flash chromatography (FC) was performed using silica gel 60 (200-300 mesh). Doubly distilled water was used throughout the experiments.

**Instruments:** UV absorption spectra were obtained on Shimadzu UV-2350 Spectrophotometer. Fluorescence emission spectra were obtained on Varian Cary Eclipse Fluorescence spectrophotometer.  $^1\text{H}$  NMR and  $^{13}\text{C}$  NMR were measured on a Bruker AV400 Nuclear Magnetic Resonance Spectrometer. Bruker MALDI-TOF-TOF Mass Spectrometer was used for high resolution mass spectrometer. Fluorescence images were acquired on Zeiss LSM710 confocal laser-scanning microscope.

**General detection procedures:** Compound **Rhod-CHO** was dissolved in  $\text{CH}_3\text{CN}$  to make a  $1.0 \times 10^{-3}$  M stock solution, which was

further diluted to required concentration for measurement. Silver ion was prepared from its nitrate, and the other ions were prepared from their chloride salts. The cysteine (Cys), homocysteine (Hcy), glutathione (GSH), hydrogen sulfide (H<sub>2</sub>S) and metal ions stock solution of  $1.0 \times 10^{-2}$  M was diluted to  $1.0 \times 10^{-3}$  M with deionized water for spectra titration studies. Spectra data were recorded in an indicated time after the addition.

## 2. Synthesis Section

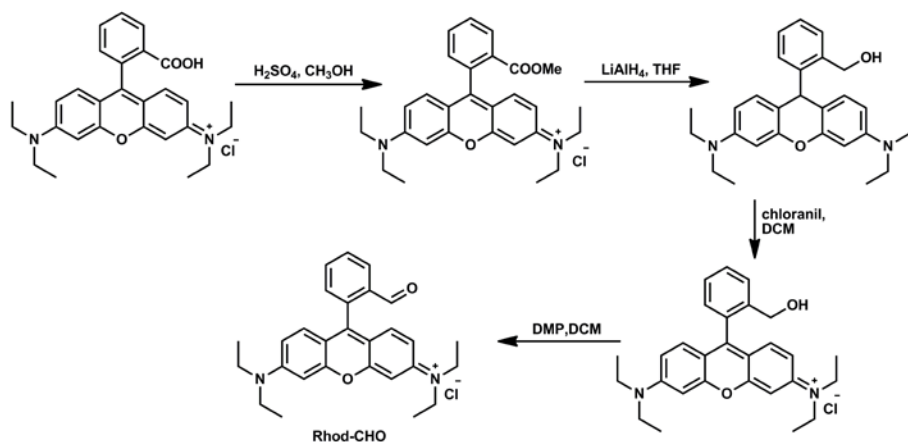

**Scheme 1.** Synthesis of fluorescent rhodamine-formaldehyde probe (**Rhod-CHO**)

### Synthesis of *N*-(6-(diethylamino)-9-(2-hydroxymethylphenyl)-3*H*-xanthen-3-ylidene)-*N*-ethylethanaminium

Rhodamine B 479 mg (1 mmol, 1 eq.) was dissolved in MeOH (20 mL). The solution was acidified with H<sub>2</sub>SO<sub>4</sub>, and then stirred overnight at 80 °C under N<sub>2</sub>

atmosphere. The solvent was removed by evaporation, and the residue was dissolved in CH<sub>2</sub>Cl<sub>2</sub> and the solution was washed with water and sat. NaHCO<sub>3</sub>. The organic layer was dried over Na<sub>2</sub>SO<sub>4</sub> and evaporated to dryness. A solution of the residue in THF (20 mL) was sealed in a two-necked flask under N<sub>2</sub> atmosphere. Then, 380 mg (10 mmol, 10 eq.) of LiAlH<sub>4</sub> was added at 0 °C. The mixture was brought to room temperature and stirred for 3 h. The reaction was quenched by addition of sat. NH<sub>4</sub>Cl (10 mL), and the solvent was removed by evaporation. The residue was dissolved in CH<sub>2</sub>Cl<sub>2</sub> and the solution was washed with sat. NaHCO<sub>3</sub>. The organic layer was dried over Na<sub>2</sub>SO<sub>4</sub> and evaporated to dryness. The crude intermediate was dissolved in 20 mL of CH<sub>2</sub>Cl<sub>2</sub>, and *p*-chloranil 246 mg (1 mmol, 1 eq) was then added. The reaction mixture was stirred for 1 h. The residue was separated on a neutral alumina column packed with CH<sub>2</sub>Cl<sub>2</sub>. The organic solvents were removed by evaporation to give a white solid (210 mg, 45.3%). <sup>1</sup>H NMR (CDCl<sub>3</sub>, 400 MHz) δ (ppm): 7.46-7.33 (1 H, m), 7.24 (1 H, dt, *J* = 4.8, 3.6 Hz), 6.67 (1 H, d, *J* = 8.6 Hz), 6.37 (1 H, d, *J* = 2.5 Hz), 6.26 (1 H, dd, *J* = 8.6, 2.6 Hz), 5.33 (1 H, s), 4.55 (1 H, s), 3.31 (1 H, q, *J* = 7.1 Hz), 1.14 (1 H, t, *J* = 7.0 Hz). <sup>13</sup>C NMR (CDCl<sub>3</sub>, 100 MHz) δ (ppm): 151.65, 147.76, 138.60, 131.43, 129.96, 129.62, 128.01, 126.94, 111.39, 107.40, 98.75, 63.03, 44.40, 12.64.

### Synthesis of Rhod-CHO

To a solution of compound **1** (5 g) in dichloromethane (30 mL), DMP was slowly added. The mixture was stirred at r.t. for 1 h. The organic layer was

washed with NaS<sub>2</sub>O<sub>3</sub> and brine. The organic layer was dried over Na<sub>2</sub>SO<sub>4</sub> and evaporated to dryness. The residue was purified by neutral alumina column using ethyl acetate-hexane (10 : 1) as the eluent. The solvent was evaporated and the residue was dissolved in 10 mL of CH<sub>2</sub>Cl<sub>2</sub>, washed with 10% HCl, and removal of solvent to give the desired compound **Rhod-CHO** (yield, 72%). <sup>1</sup>H NMR (CDCl<sub>3</sub>, 400 MHz) δ (ppm): 9.88 (1 H, s), 8.22 (1 H, d, *J* = 7.4 Hz), 7.91 (2 H, dt, *J* = 20.4, 7.5 Hz), 7.43 (1 H, d, *J* = 7.0 Hz), 7.07 (2 H, d, *J* = 9.5 Hz), 6.99-6.91 (2 H, m), 6.88 (2 H, s), 3.67 (8 H, q, *J* = 7.2 Hz), 1.35 (12 H, t, *J* = 7.1 Hz). <sup>13</sup>C NMR (CDCl<sub>3</sub>, 100 MHz) δ (ppm): 190.34, 157.68, 156.06, 155.72, 134.70, 134.60, 132.99, 132.66, 131.21, 131.06, 130.59, 114.62, 113.86, 96.53, 46.28, 12.69. HRMS: calcd for [M<sup>+</sup>]: 427.2380, found: 427.2387.

### Synthesis of RS

To a solution of compound **Rhod-CHO** (25 mg) in dichloromethane (5 mL), 0.1 g of NaHS was added. The mixture was stirred at r.t. for 30 min. The solution was poured into water (10 mL) and then extracted using dichloromethane/water (10 mL). The organic layer was collected, dried over sodium sulfate and then evaporated in vacuo. The residue was purified by neutral alumina column using DCM as the eluent to afford **RS** (yield, 83%). <sup>1</sup>H NMR (CDCl<sub>3</sub>, 400 MHz) δ (ppm): 7.56 (1 H, d, *J* = 7.6 Hz), 7.36 (1 H, dd, *J* = 10.8 Hz, 4.1 Hz), 7.30 (1 H, t, *J* = 7.0 Hz), 6.97 (1 H, d, *J* = 7.6 Hz), 6.90 (1 H, d, *J* = 8.8 Hz), 6.79-6.70 (2 H, m), 6.38-6.27 (4 H, m), 3.32 (8 H, q, *J* = 7.1 Hz), 1.15 (12 H, t, *J* = 7.0 Hz). <sup>13</sup>C NMR (CDCl<sub>3</sub>, 100 MHz) δ (ppm): 152.30, 151.29, 149.59, 148.00, 147.97, 142.62, 130.91,

130.33, 129.83, 127.75, 126.94, 124.76, 114.27, 112.63, 108.29, 108.12, 97.44, 83.87, 44.38, 12.71. HRMS: calcd for [M+H]: 461.2257, found: 461.2246.

### 3. Absorption and Emission Spectra of Rhod-CHO with NaHS

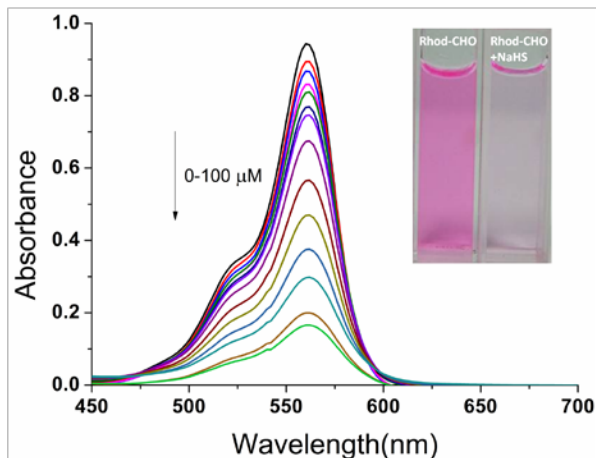

**Fig. S1** Absorption and emission spectra of **Rhod-CHO** (10 μM) in PBS (20 mM, pH 7.4, 1% CH<sub>3</sub>CN, v/v) upon titration with 100 μM NaHS. Inset: The visual light color change of **Rhod-CHO** (10 μM) before (left) and after (right) addition of 10 equiv. of NaHS.

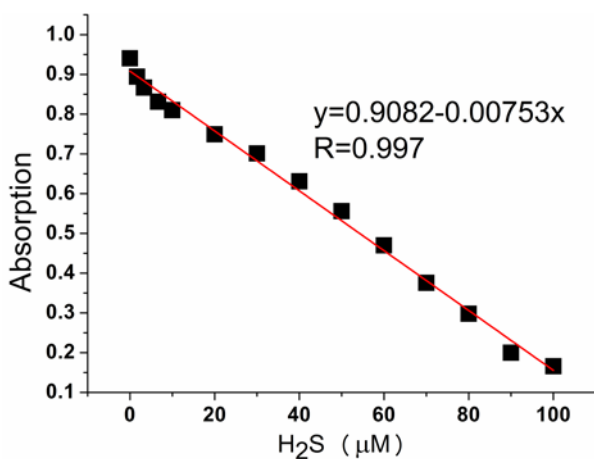

**Fig. S2** The linear relationship between the absorption and the concentration of NaHS (0-100 μM)

#### 4. Time dependence of fluorescence profile of Rhod-CHO upon addition of NaHS in PBS buffer

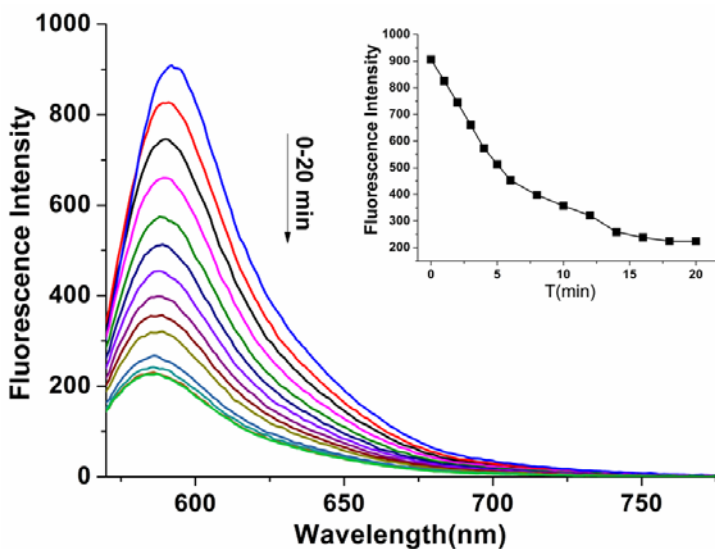

**Fig. S3** Time dependence of fluorescence profile of **Rhod-CHO** (10  $\mu$ M) with 10 equiv. of NaHS in PBS (20 mM, pH 7.4, 1% CH<sub>3</sub>CN, v/v).  $\lambda_{\text{ex}}$ : 560 nm. Slits: 5/5 nm. Inset: Fluorescence intensity changes of **Rhod-CHO** upon addition 10 equiv. NaHS from 0 to 20 min.

## 5. Fluorescence response of Rhod-CHO upon addition of various species in PBS buffer

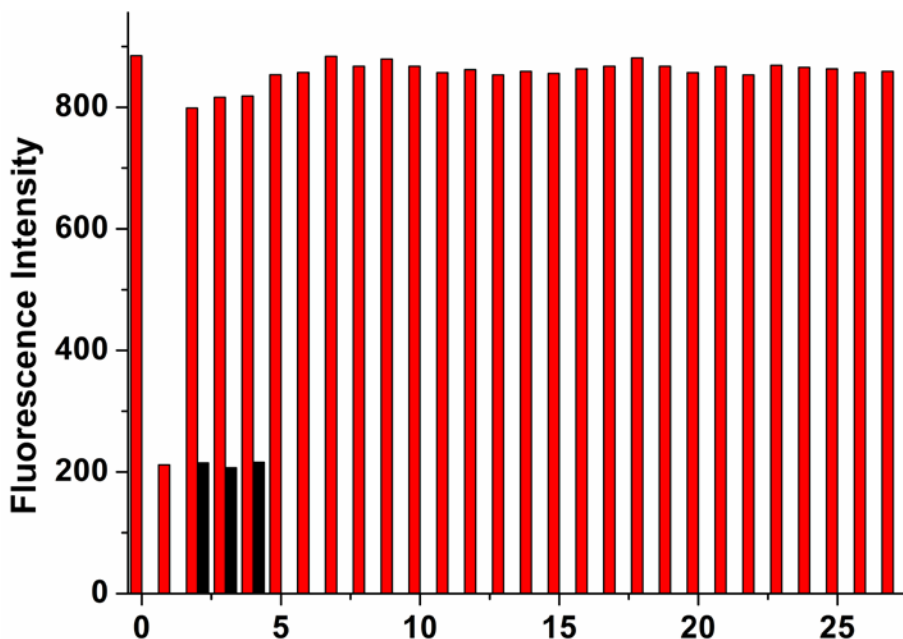

**Fig. S4** Fluorescence response of **Rhod-CHO** (10  $\mu\text{M}$ ) upon addition of various species in PBS buffer (20  $\mu\text{M}$ , pH 7.4).  $\lambda_{\text{ex}} = 560 \text{ nm}$ ,  $\lambda_{\text{em}} = 592 \text{ nm}$ . Slits: 5/5 nm. (0) Rhod-CHO; (1) 100  $\mu\text{M}$  NaHS; (2) 200  $\mu\text{M}$  GSH left red bar, 200  $\mu\text{M}$  GSH +100  $\mu\text{M}$  NaHS right black bar; (3) 200  $\mu\text{M}$  Cys left red bar, 200  $\mu\text{M}$  Cys+100  $\mu\text{M}$  NaHS right black bar; (4) 200  $\mu\text{M}$  Hcy left red bar, 200  $\mu\text{M}$  Hcy +100  $\mu\text{M}$  NaHS right black bar; (5) 200  $\mu\text{M}$   $\text{F}^-$ ; (6) 200  $\mu\text{M}$   $\text{HSO}_3^-$ ; (7) 200  $\mu\text{M}$   $\text{CN}^-$ ; (8) 200  $\mu\text{M}$   $\text{AcO}^-$ ; (9) 200  $\mu\text{M}$   $\text{S}_2\text{O}_3^{2-}$ ; (10) 200  $\mu\text{M}$   $\text{CO}_3^{2-}$ ; (11) 100  $\mu\text{M}$   $\text{Cu}^{2+}$ ; (12) 200  $\mu\text{M}$   $\text{Zn}^{2+}$ ; (13) 200  $\mu\text{M}$   $\text{Mn}^{2+}$ ; (14) 200  $\mu\text{M}$   $\text{Hg}^{2+}$ ; (15) 200  $\mu\text{M}$   $\text{SO}_4^{2-}$ ; (16) 200  $\mu\text{M}$   $\text{NO}_3^{2-}$ ; (17) 200  $\mu\text{M}$  lipoic acid; (18) 200  $\mu\text{M}$   $\text{SCN}^-$ ; (19) 200  $\mu\text{M}$   $\text{NO}^{2-}$ ; (20) 200  $\mu\text{M}$   $\text{NO}$ ; (21) 200  $\mu\text{M}$   $\text{H}_2\text{O}_2$ ; (22) 200  $\mu\text{M}$   $\text{O}_2^-$ ; (23) 200  $\mu\text{M}$   $\text{t-BuOOH}$ ; (24) 200  $\mu\text{M}$   $\text{HOCl}$ ; (25) 200  $\mu\text{M}$   $\text{Ca}^{2+}$ ; (26) 200  $\mu\text{M}$   $\text{Fe}^{3+}$ ; (27) 200  $\mu\text{M}$   $\text{Mg}^{2+}$ .



## 6. $^1\text{H}$ NMR, $^{13}\text{C}$ NMR and HRMS of Rhod-CHO

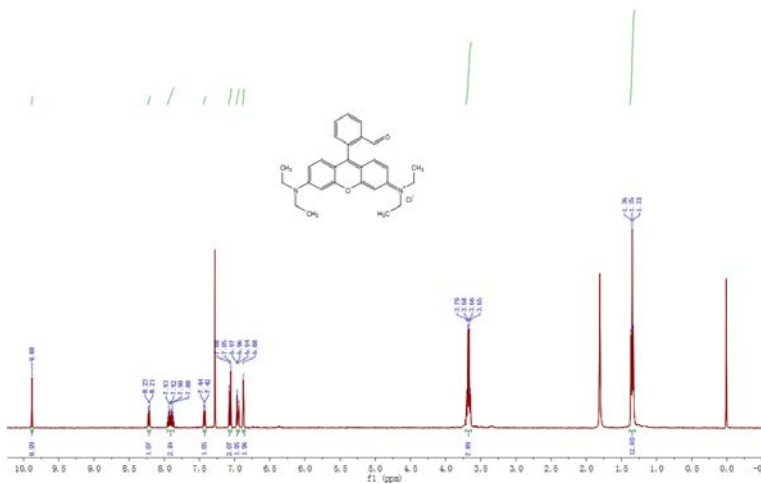

Fig. S5  $^1\text{H}$ -NMR spectra of Rhod-CHO

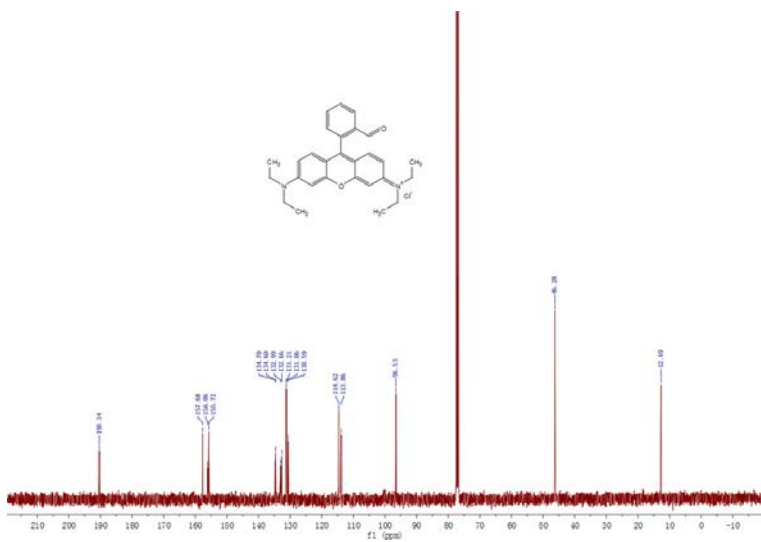

Fig. S6  $^{13}\text{C}$ -NMR spectra of Rhod-CHO

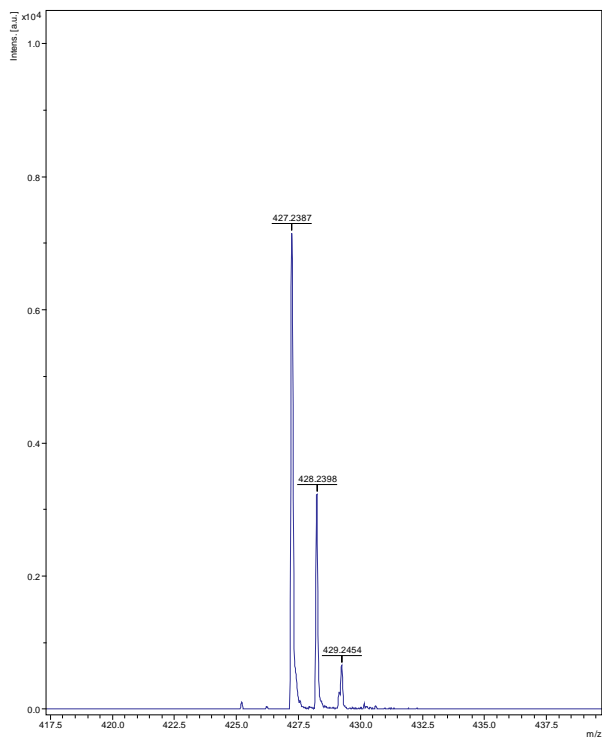

**Fig. S7 HRMS of Rhod-CHO**  
**7.  $^1\text{H}$  NMR,  $^{13}\text{C}$  NMR and HRMS of RS**

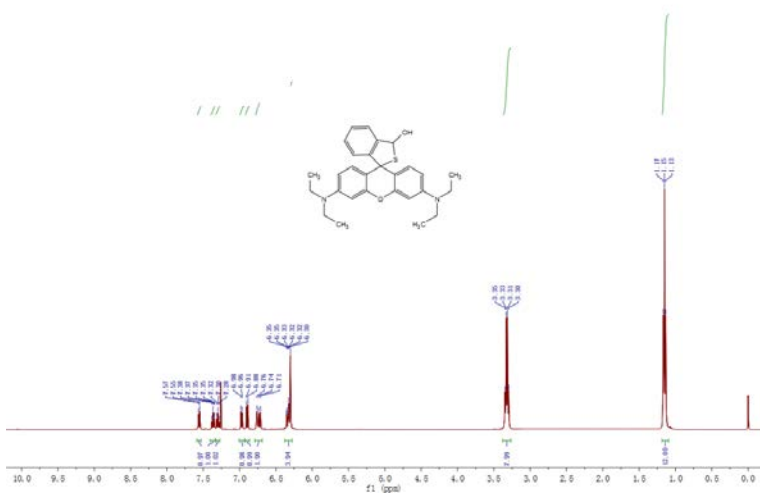

**Fig. S8  $^1\text{H}$ -NMR spectra of RS**

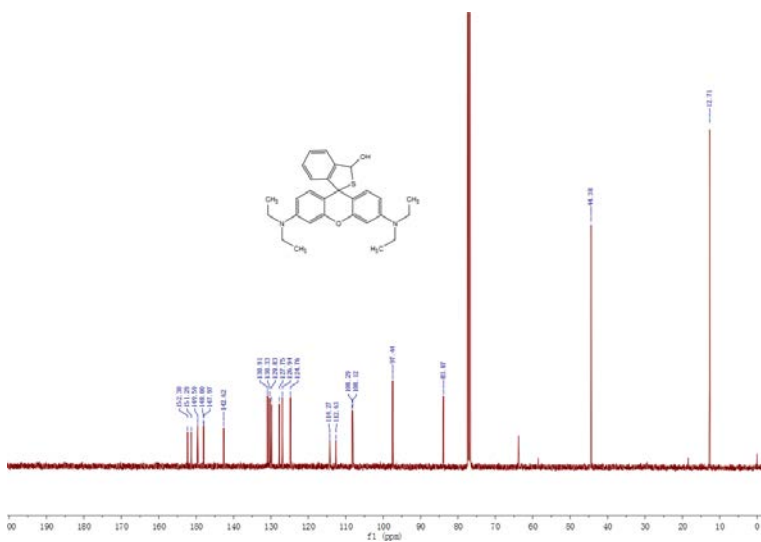

Fig. S9  $^{13}\text{C}$ -NMR spectra of RS

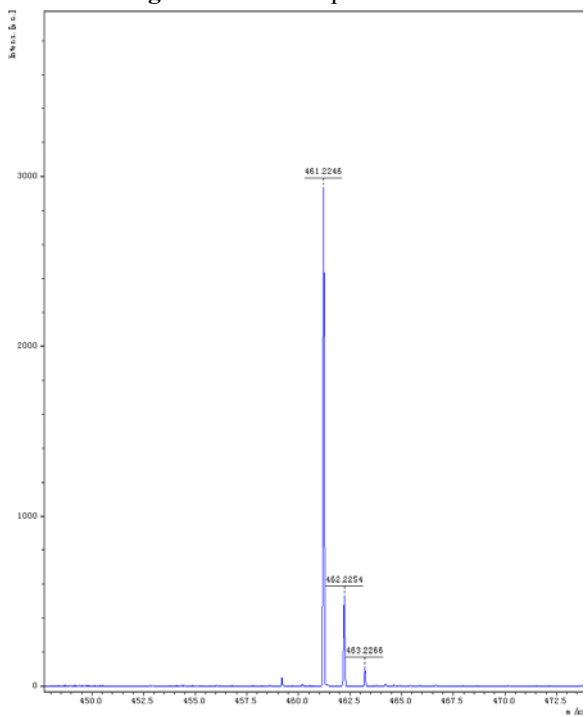

Fig. S10 HRMS spectra of RS
